# Supplementary material
Source: HighWire-hosted journal article supplement (https://jitc.bmj.com/content/10/12/e005802)
Supplement: inline-supplementary-material-1 [file inline-supplementary-material-1.pdf]

**Table S1 Treatment-Related Adverse Events (TEAEs) Reported in ≥5% of Patients (All Causality)**

| Preferred Term                       | Mupadolimab Monotherapy N=35* |                    |
|--------------------------------------|-------------------------------|--------------------|
|                                      | Any Grade n(%)                | Grade 3, 4, 5 n(%) |
| Subjects with any TEAE               | 33 ( 94.3)                    | 17 ( 48.6)         |
| Chills                               | 13 ( 37.1)                    | 0 ( 0.0)           |
| Fatigue                              | 8 ( 22.9)                     | 0 ( 0.0)           |
| Anaemia                              | 7 ( 20.0)                     | 1 ( 2.9)           |
| Decreased appetite                   | 7 ( 20.0)                     | 0 ( 0.0)           |
| Nausea                               | 7 ( 20.0)                     | 0 ( 0.0)           |
| Vomiting                             | 7 ( 20.0)                     | 0 ( 0.0)           |
| Constipation                         | 6 ( 17.1)                     | 0 ( 0.0)           |
| Arthralgia                           | 5 ( 14.3)                     | 1 ( 2.9)           |
| Dehydration                          | 4 ( 11.4)                     | 0 ( 0.0)           |
| Diarrhoea                            | 4 ( 11.4)                     | 0 ( 0.0)           |
| Hyperglycaemia                       | 4 ( 11.4)                     | 1 ( 2.9)           |
| Pain in extremity                    | 4 ( 11.4)                     | 0 ( 0.0)           |
| Pruritus                             | 4 ( 11.4)                     | 0 ( 0.0)           |
| Pyrexia                              | 4 ( 11.4)                     | 0 ( 0.0)           |
| Tumour pain                          | 4 ( 11.4)                     | 0 ( 0.0)           |
| Weight decreased                     | 4 ( 11.4)                     | 0 ( 0.0)           |
| Abdominal distension                 | 3 ( 8.6)                      | 0 ( 0.0)           |
| Abdominal pain                       | 3 ( 8.6)                      | 0 ( 0.0)           |
| Alanine aminotransferase increased   | 3 ( 8.6)                      | 1 ( 2.9)           |
| Aspartate aminotransferase increased | 3 ( 8.6)                      | 2 ( 5.7)           |
| Back pain                            | 3 ( 8.6)                      | 0 ( 0.0)           |
| Blood creatinine increased           | 3 ( 8.6)                      | 0 ( 0.0)           |
| Cough                                | 3 ( 8.6)                      | 0 ( 0.0)           |
| Dizziness                            | 3 ( 8.6)                      | 0 ( 0.0)           |
| Dyspnoea                             | 3 ( 8.6)                      | 1 ( 2.9)           |
| Arthritis                            | 2 ( 5.7)                      | 0 ( 0.0)           |
| Blood alkaline phosphatase increased | 2 ( 5.7)                      | 1 ( 2.9)           |
| Blood bilirubin increased            | 2 ( 5.7)                      | 1 ( 2.9)           |
| Cognitive disorder                   | 2 ( 5.7)                      | 1 ( 2.9)           |
| Flank pain                           | 2 ( 5.7)                      | 0 ( 0.0)           |
| Haematuria                           | 2 ( 5.7)                      | 0 ( 0.0)           |
| Headache                             | 2 ( 5.7)                      | 0 ( 0.0)           |
| Hydronephrosis                       | 2 ( 5.7)                      | 0 ( 0.0)           |
| Hyperkalaemia                        | 2 ( 5.7)                      | 0 ( 0.0)           |
| Hypertension                         | 2 ( 5.7)                      | 0 ( 0.0)           |
| Hypoalbuminaemia                     | 2 ( 5.7)                      | 0 ( 0.0)           |

| Preferred Term                    | Mupadolimab Monotherapy N=35* |                    |
|-----------------------------------|-------------------------------|--------------------|
|                                   | Any Grade n(%)                | Grade 3, 4, 5 n(%) |
| Hypocalcaemia                     | 2 ( 5.7)                      | 0 ( 0.0)           |
| Hyponatraemia                     | 2 ( 5.7)                      | 1 ( 2.9)           |
| Hypophosphataemia                 | 2 ( 5.7)                      | 0 ( 0.0)           |
| Insomnia                          | 2 ( 5.7)                      | 0 ( 0.0)           |
| Lethargy                          | 2 ( 5.7)                      | 0 ( 0.0)           |
| Lipase increased                  | 2 ( 5.7)                      | 0 ( 0.0)           |
| Lymphopenia                       | 2 ( 5.7)                      | 1 ( 2.9)           |
| Muscle spasms                     | 2 ( 5.7)                      | 0 ( 0.0)           |
| Musculoskeletal pain              | 2 ( 5.7)                      | 0 ( 0.0)           |
| Paraesthesia                      | 2 ( 5.7)                      | 0 ( 0.0)           |
| Upper respiratory tract infection | 2 ( 5.7)                      | 0 ( 0.0)           |
| Urinary tract infection           | 2 ( 5.7)                      | 0 ( 0.0)           |
| Visual impairment                 | 2 ( 5.7)                      | 0 ( 0.0)           |

\*One patient was evaluable for safety only.

## Figure S1

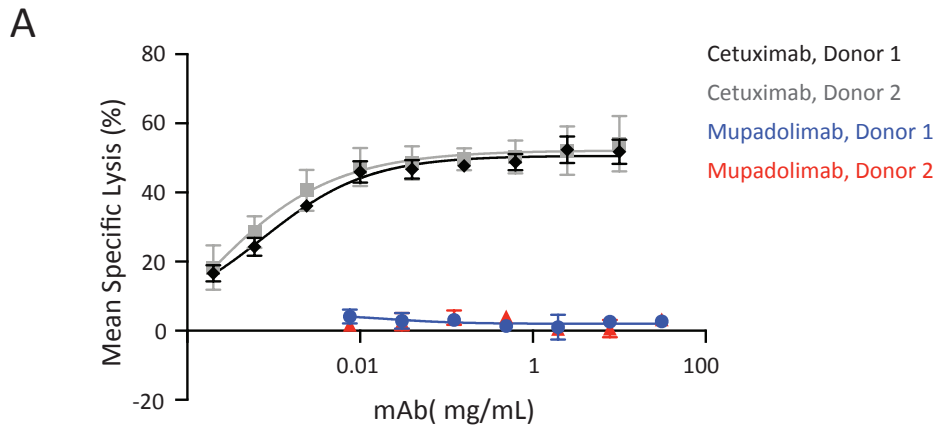**B**

| Antibody    | KD (M)   | Kon (1/Ms) | Kdis (1/s) |
|-------------|----------|------------|------------|
| Mupadolimab | 2.07E-10 | 3.18E+05   | 6.58E-05   |
| MEDI9447    | 9.05E-11 | 4.40E+05   | 3.98E-05   |

**Figure S1.** (A) Mupadolimab does not induce ADCC. MDA-MB-231 cells were incubated with increasing concentrations of mupadolimab or anti-EGFR antibody cetuximab (positive control). ADCC activity was determined in two independent experiments with human PBMCs from 2 human donors. (B) Binding of mupadolimab or MEDI9447 to recombinant CD73-His was measured by Octet.

## Figure S2

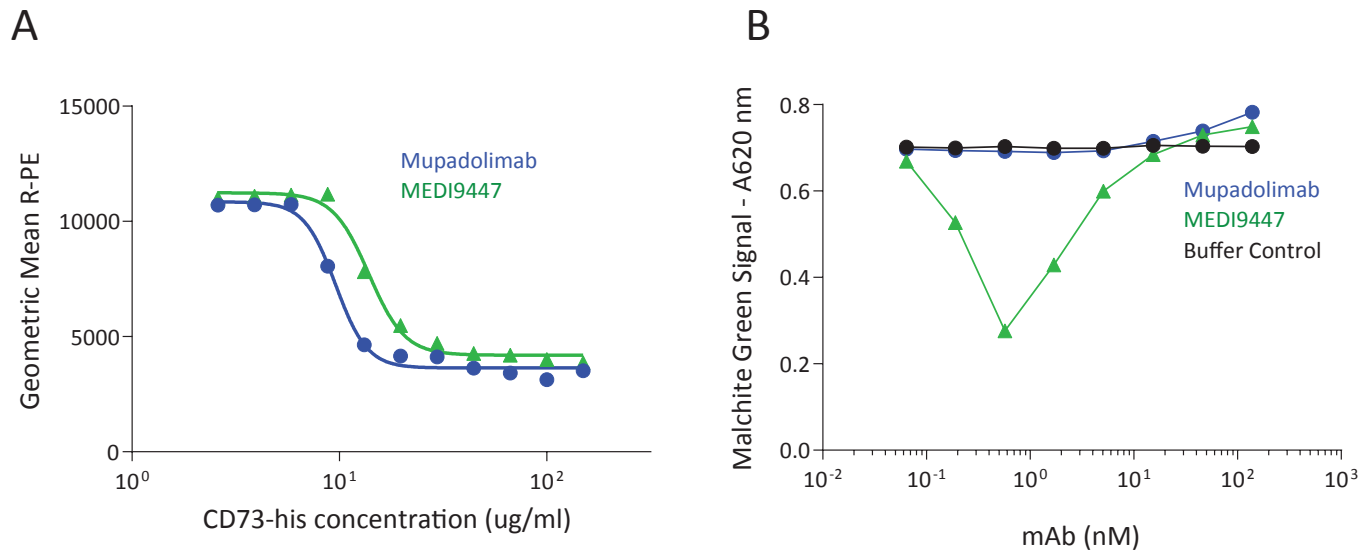

**Figure S2.** (A) Both mupadolimab and MEDI9447 bind to soluble CD73. 10 mg/mL mupadolimab or MEDI9447 was pre-incubated with a titration of soluble CD73, followed by staining of CD73-expressing cells that are detected with secondary antibody by flow cytometry. Preincubation of anti-CD73 antibodies with soluble state of CD73 reduced the binding to CD73<sup>pos</sup> cell. (B) CD73 catalytic activity was measured with soluble CD73 in the presence of mupadolimab, MEDI9447, or buffer control by adding 100 mM AMP and measuring phosphate levels after 15 min incubation.

## Figure S3

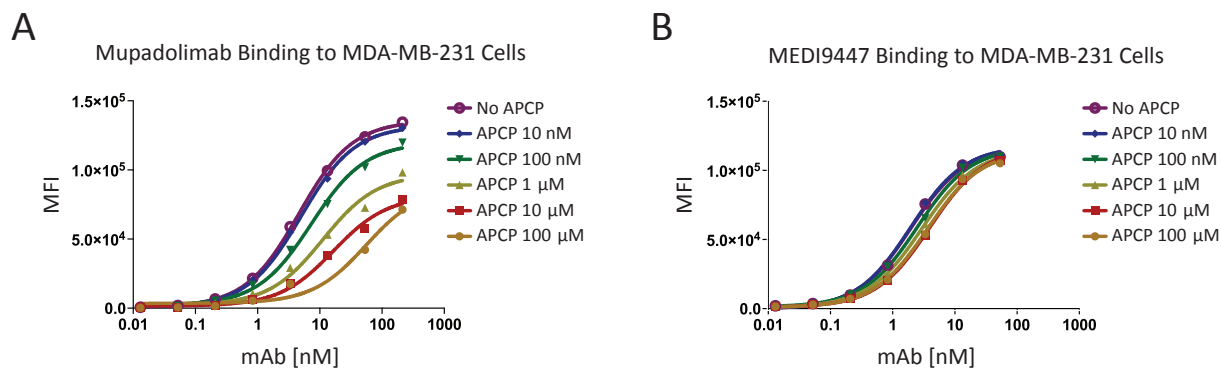

**Figure S3. Mupadolimab and MEDI9447 inhibit CD73 via distinct mechanisms.** MDA-MB-231 cells were pre-incubated with APCP and were subsequently incubated with a titration of mupadolimab (**A**) or MEDI9447 (**B**) prior to staining with a PE conjugated anti-human secondary antibody. Antibody binding was assessed by flow cytometry and mean fluorescence intensity (MFI) for PE was determined.

## Figure S4

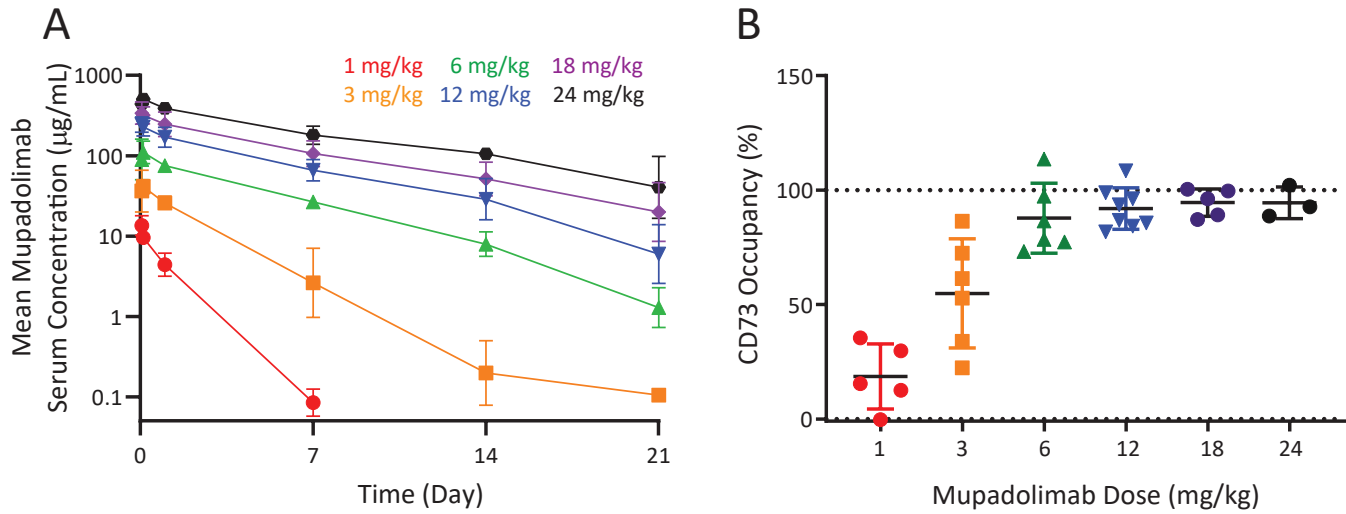

**Figure S4: Mupadolimab pharmacokinetics and CD73 occupancy.** (A) Serum samples were collected from patients treated with mupadolimab monotherapy and the level of free mupadolimab were measured. Error bars represent geometric mean  $\pm$  geometric SD. (B) Whole blood samples from patients treated with mupadolimab were fixed and receptor occupancy was measured by flow cytometry gating on CD73+ B cells. Each symbol represents a treated patient.
